# Supplementary material for: Surveying the experience of postdocs in the United States before and during the COVID-19 pandemic
Source: eLife. 2022 Jul 26;11:e75705. doi: 10.7554/eLife.75705 (PMC9322995; doi:10.7554/eLife.75705)
Supplement: Supplementary file 3. [file elife-75705-supp3.xlsx]

## Sheet: Sheet1
Pandemic Survey
	Hispanic/ Latino	White/ Caucasian	Black/ African American	Asian / Asian American	South Asian/ South East Asian	Middle Eastern	Native American/ Alaska Native	Pacific Islander/ Hawaii Native
Hispanic/ Latino	89 (5.17%)	62 (3.6%)	11 (0.64%)	2 (0.12%)	0 (0%)	0 (0%)	3 (0.17%)	0 (0%)
White/ Caucasian		1016 (59%)	5 (0.29%)	19 (1.1%)	2 (0.12%)	21 (1.22%)	11 (0.64%)	0 (0%)
Black/ African American			31 (1.8%)	0 (0%)	0 (0%)	0 (0%)	0 (0%)	0 (0%)
Asian / Asian American				281 (16.32%)	11 (0.64%)	2 (0.12%)	0 (0%)	3 (0.17%)
South Asian/ South East Asian					69 (4.01%)	0 (0%)	0 (0%)	0 (0%)
Middle Eastern						27 (1.57%)	0 (0%)	0 (0%)
Native American/ Alaska Native							0 (0%)	0 (0%)
Pacific Islander/ Hawaii Native								0 (0%)
Total*	174	1144	51	319	82	52	17	4
Pre-pandemic survey
	Hispanic/ Latino	White/ Caucasian	Black/ African American	Asian / Asian American	South Asian/ South East Asian	Middle Eastern	Native American/ Alaska Native	Pacific Islander/ Hawaii Native
Hispanic/ Latino	312 (5.11%)	188 (3.08%)	13 (0.21%)	4 (0.07%)	0 (0%)	0 (0%)	3 (0.05%)	0 (0%)
White/ Caucasian		3190 (52.20%)	19 (0.3%)	55 (0.90%)	7 (0.11%)	74 (1.21%)	18 (0.29%)	1 (0.02%)
Black/ African American			131 (2.14%)	1 (0.02%)	0 (0%)	1 (0.02%)	0 (0%)	0 (0%)
Asian / Asian American				1151 (18.83%)	29 (0.47%)	0 (0%)	0 (0%)	9 (0.15%)
South Asian/ South East Asian					291 (4.76%)	0 (0%)	0 (0%)	1 (0.02%)
Middle Eastern						124 (2.03%)	0 (0%)	0 (0%)
Native American/ Alaska Native							2 (0.03%)	0 (0%)
Pacific Islander/ Hawaii Native								1 (0.02%)
Total*	535	3570	176	1258	332	206	30	14
In the pandemic survey, 49 (2.85%) respondents did not identify any race or ethnicity and 8 (0.46%) respondents identified >=3 races or ethnicities. In the pre-pandemic survey, considering only US Postdocs, 301 (4.8%) respondents did not identify any race or ethnicity and 25 (0.4%) respondents identified >=3 races or ethnicities. * Number of individual who identify to each ethnicity/race.
